# Supplementary material for: Multimodal neuroimaging data boosts the prediction of multifaceted cognition
Source: Research Square preprint supplement (doi:10.21203/rs.3.rs-7721822/v1), 2025-11-19
Supplement: Supplementary file 1 [file a0520f55d452a1e850144f75.docx]

Supplemental Materials

# Table S1 psychometric variable names

| Psychometric variable | HCP-YA variable name | HCP Lifespan (HCP-A and HCP-D) variable name |
| --- | --- | --- |
| Total cognition | CogTotalComp_AgeAdj | nih_totalcogcomp_ageadjusted in cogcomp01.txt |
| Crystallized cognition | CogCrystalComp_AgeAdj | nih_crycogcomp_ageadjusted in cogcomp01.txt |
| Fluid cognition | CogFluidComp_AgeAdj | nih_fluidcogcomp_ageadjusted in cogcomp01.txt |
| Cognitive flexibility | CardSort_AgeAdj | nih_dccs_ageadjusted in dccs01.txt |
| Inhibitory control | Flanker_AgeAdj | nih_flanker_ageadjusted in flanker01.txt |
| Reading | ReadEng_AgeAdj | read_acss in orrt01.txt |
| Picture vocabulary | PicVocab_AgeAdj | tpvt_acss in tpvt01.txt |
| Processing speed | ProcSpeed_AgeAdj | nih_patterncomp_ageadjusted in pcps01.txt |
| Working memory | ListSort_AgeAdj | age_corrected_standard_score in lswmt01.txt |
| Anger affect | AngAffect_Unadj | anger_ts in prang01.txt |
| Fear affect | FearAffect_Unadj | anx_ts in preda01.txt |
| Sadness | Sadness_Unadj | add_ts in predd01.txt |
| Positive affect | PosAffect_Unadj | tlbxpa_ts in tlbx_wellbeing01.txt |
| Emotional support | EmotSupp_Unadj | nih_tlbx_tscore in tlbx_emsup01.txt |
| Friendship | Friendship_Unadj | nih_tlbx_tscore in tlbx_friend01.txt |
| Loneliness | Loneliness_Unadj | soil_ts in prsi01.txt |
| Neuroticism (NEO) | NEOFAC_N | neo2_score_ne in nffi01.txt |
| Extraversion (NEO) | NEOFAC_E | neo2_score_ex in nffi01.txt |
| Openness (NEO) | NEOFAC_O | neo2_score_op in nffi01.txt |
| Agreeableness (NEO) | NEOFAC_A | neo2_score_ag in nffi01.txt |
| Conscientiousness (NEO) | NEOFAC_C | neo2_score_co in nffi01.txt |

# B. Supplementary Figures


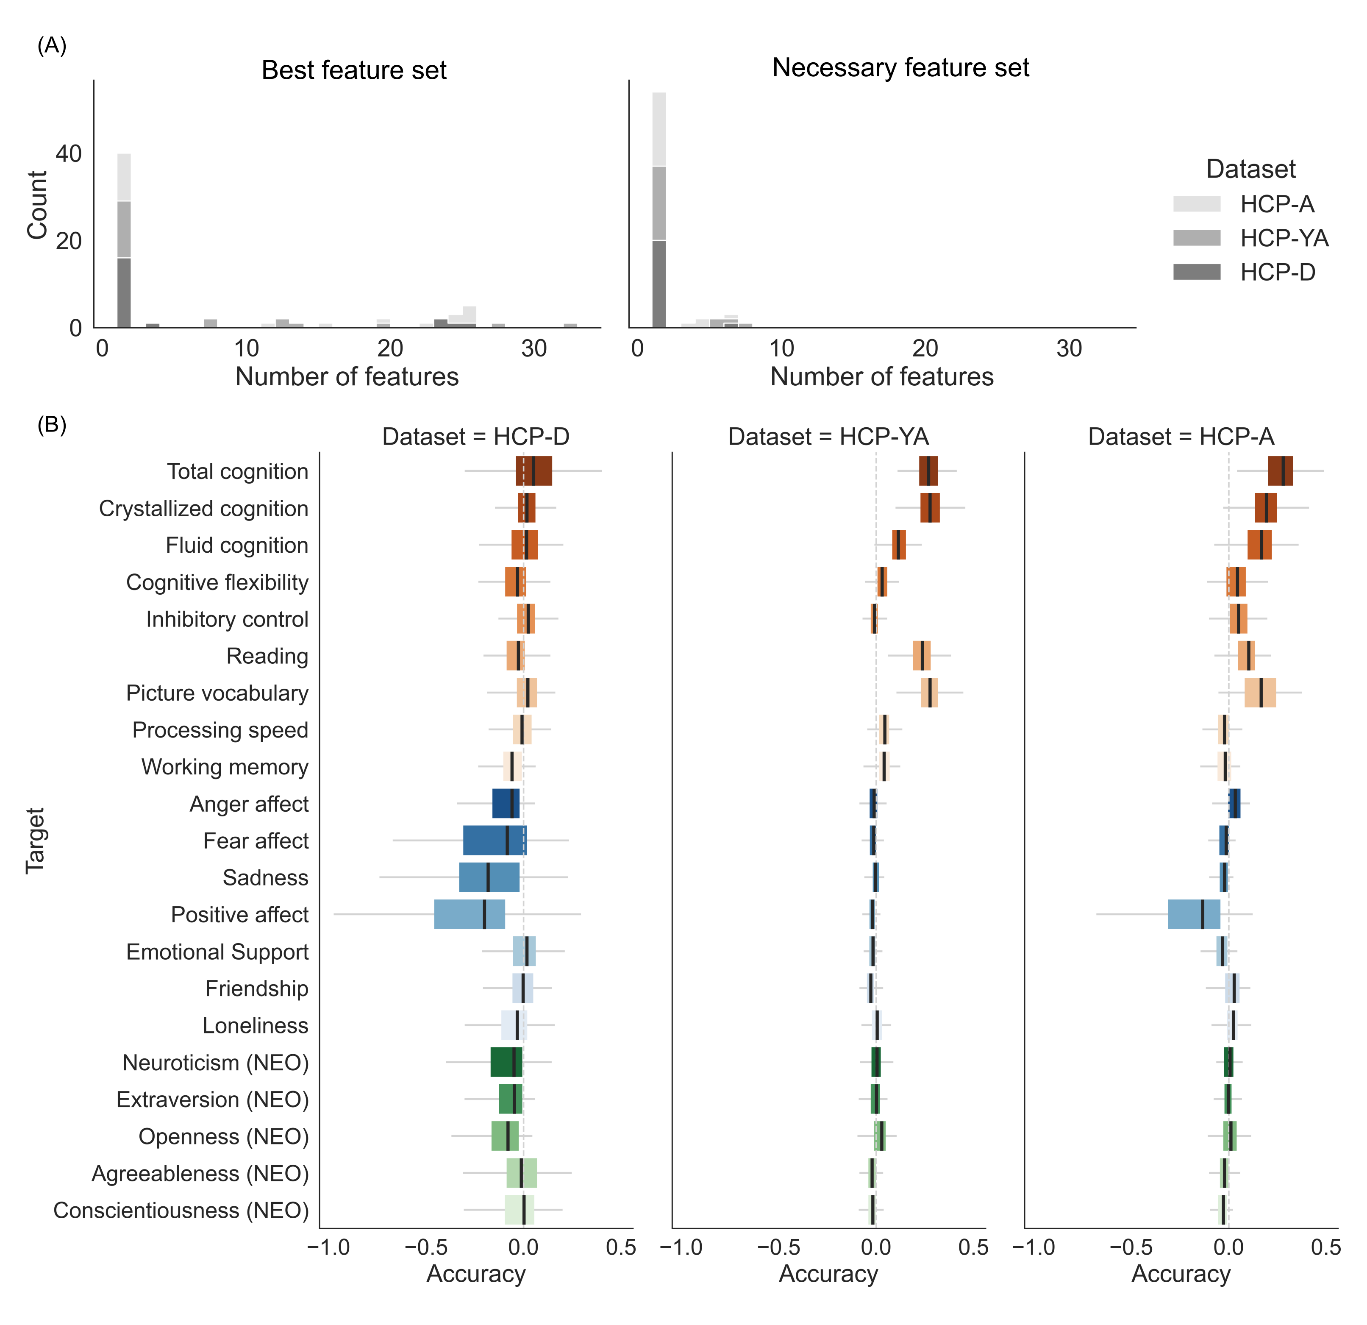


**Figure S1.** (A) Distribution of number of feature types integrated for the “best” feature sets (left column) and for the “necessary” feature sets (right column) based on COD accuracy. Colour hues represent which dataset the feature sets were found in. (B) Prediction accuracies by COD for each psychometric variable using the integrated-features set model corresponding the “necessary” feature set, in each cohort. The light grey vertical line in each column marks the accuracy of R = 0.
